# Supplementary material for: Anti-osteoporotic effects of mixed compositions of extracellular polymers isolated from Aureobasidium pullulans and Textoria morbifera in ovariectomized mice
Source: BMC Complement Altern Med. 2018 Nov 6;18:295. doi: 10.1186/s12906-018-2362-y (PMC6220464; doi:10.1186/s12906-018-2362-y)
Supplement: Supplementary file 7 — Raw data for Histopathology and Histomorphometry of the femur in sham-operated and OVX mice: Trabecular Bones. OVX: Bilateral ovariectomy; RES: Risedronate sodium; EAP: Exopolymers purified from A. pullulans SM2001; TM: T. morbifera leaf extracts; (EAP:TM): Mixed formula consisted of EAP and TM (g/g). Values are expressed mean ± S.D. of eight mice. TV/BV = Trabecular bone volume (%); Tbn = Trabecular bone number (Numbers/epiphyseal); Tbl = Trabecular bone length (Longitudinal thickness; μm); Tbt = Trabecular bone thickness (Cross thickness; μm). (XLSX 23 kb) [file 12906_2018_2362_MOESM7_ESM.xlsx]

## Sheet: Sheet1
Histopathology - bone mass														[Glu-TM Mix SE]
Left Femur
1. TV/BV (%)
Mice	Sham	Control	Risedronate	EAP 200	TM 200	1:1	1:3	1:5	1:7	1:9	3:1	5:1	7:1	9:1
1	38.54	11.62	49.76	25.96	22.76	25.48	22.54	18.16	22.81	21.92	38.17	24.06	23.54	25.82
2	40.22	10.08	52.82	24.81	21.098	20.72	19.48	20.37	20.41	20.75	29.49	22.75	26.16	26.92
3	37.92	9.82	38.17	26.17	19.42	23.62	20.72	19.48	19.45	24.86	30.17	25.81	22.86	27.31
4	43.82	12.48	35.02	20.22	18.57	25.81	23.62	25.81	25.81	23.75	35.54	26.92	25.02	22.06
5	32.65	15.04	36.82	27.49	27.36	28.22	25.48	19.45	23.92	30.22	33.62	25.17	28.61	20.47
6	33.07	8.32	44.17	23.82	22.02	30.17	25.16	27.06	26.71	28.42	37.25	23.16	21.06	21.81
7	48.16	10.49	43.02	22.54	25.52	21.54	23.02	26.17	27.54	19.54	40.22	22.82	20.74	22.65
8	40.28	12.81	52.16	27.02	25.41	19.48	29.45	22.81	20.44	19.81	38.92	29.81	27.11	23.28
Mean	39.3325	11.3325	43.9925	24.7538	22.7698	24.38	23.6837	22.4138	23.3863	23.6588	35.4225	25.0625	24.3875	23.79
SD	5.15815	2.10338	7.01759	2.46154	3.11267	3.7335	3.09062	3.52644	3.11276	3.9719	4.00327	2.43664	2.83376	2.558
TTEST-S		1.0323e-09	0.152431	4.46161e-06	1.90317e-06	1.11085e-05	3.56082e-06	2.26697e-06	2.93875e-06	8.46486e-06	0.112433	5.54951e-06	4.69137e-06	2.34737e-06
TTEST-O			4.94021e-09	1.25975e-08	5.75423e-07	5.74809e-07	2.14842e-07	2.35479e-06	3.06493e-07	1.95716e-06	4.79729e-10	8.73181e-09	5.31678e-08	4.31184e-08
TTEST-EAP						0.816553	0.456415	0.1461	0.34627	0.518224	1.59757e-05	0.804603	0.786596	0.45533
TTEST-TM						0.364656	0.565009	0.833578	0.69799	0.62602	5.70767e-06	0.123165	0.295389	0.485614
ANOVA-S		<0.01	NS	<0.01	<0.01	<0.01	<0.01	<0.01	<0.01	<0.01	NS	<0.01	<0.01	<0.01
ANOVA-O			<0.01	<0.01	<0.01	<0.01	<0.01	<0.01	<0.01	<0.01	<0.01	<0.01	<0.01	<0.01
ANOVA-EAP						NS	NS	NS	NS	NS	<0.01	NS	NS	NS
ANOVA-TM						NS	NS	NS	NS	NS	<0.01	NS	NS	NS
% Changes		-71.1879	288.198	118.432	100.924	115.133	108.99	97.7829	106.364	108.769	212.574	121.156	115.2	109.927
2. Tbn (number/epiphyseal)
Mice	Sham	Control	Risedronate	EAP 200	TM 200	1:1	1:3	1:5	1:7	1:9	3:1	5:1	7:1	9:1
1	18	3	28	12	7	10	11	7	9	11	18	12	10	12
2	21	5	32	11	8	9	12	9	10	12	20	9	9	11
3	17	2	22	10	15	8	9	10	11	9	21	10	8	9
4	19	3	36	9	7	12	8	11	13	8	18	11	11	8
5	21	3	31	8	7	13	9	13	8	10	17	10	10	10
6	22	4	19	10	6	12	10	8	9	13	15	11	12	7
7	16	5	27	11	9	8	11	9	8	14	16	10	13	13
8	15	2	25	13	11	7	12	10	7	10	18	8	7	15
Mean	18.625	3.375	27.5	10.5	8.75	9.875	10.25	9.625	9.375	10.875	17.875	10.125	10	10.625
SD	2.55999	1.18773	5.52914	1.60357	2.96407	2.23207	1.48805	1.84681	1.92261	2.03101	1.95941	1.24642	2	2.66927
TTEST-S		3.96943e-10	0.00104103	2.44673e-06	5.08009e-06	3.9907e-06	1.36971e-06	1.24753e-06	1.06824e-06	9.97566e-06	0.5212	7.26592e-07	2.83817e-06	2.65936e-05
TTEST-O			8.7184e-09	8.26882e-08	0.000304073	4.08696e-06	7.18842e-08	1.27214e-06	2.83796e-06	3.31602e-07	4.81328e-11	2.55948e-08	1.26307e-06	6.06491e-06
TTEST-EAP						0.530487	0.751298	0.32877	0.224449	0.688098	9.71066e-07	0.609673	0.589867	0.911215
TTEST-TM						0.405577	0.221621	0.490169	0.624597	0.116567	4.13472e-06	0.246503	0.339561	0.204928
ANOVA-S		<0.01	<0.01	<0.01	<0.01	<0.01	<0.01	<0.01	<0.01	<0.01	NS	<0.01	<0.01	<0.01
ANOVA-O			<0.01	<0.01	<0.01	<0.01	<0.01	<0.01	<0.01	<0.01	<0.01	<0.01	<0.01	<0.01
ANOVA-EAP						NS	NS	NS	NS	NS	<0.01	NS	NS	NS
ANOVA-TM						NS	NS	NS	NS	NS	<0.01	NS	NS	NS
% Changes		-81.8792	714.815	211.111	159.259	192.593	203.704	185.185	177.778	222.222	429.63	200	196.296	214.815
3. Tbl (mm)
Mice	Sham	Control	Risedronate	EAP 200	TM 200	1:1	1:3	1:5	1:7	1:9	3:1	5:1	7:1	9:1
1	1095.85	270.66	880.81	585.18	771.08	645.94	709.7	560.36	693.57	617.93	1013.16	702.95	679.37	663.98
2	925.87	405.37	917.54	602.72	629.54	592.81	598.82	627.58	701.25	702.82	992.82	773.92	611.54	492.81
3	1017.39	332.82	820.62	431.16	802.42	601.75	813.92	701.22	654.11	611.58	839.54	654.82	598.29	598.71
4	887.62	254.16	639.54	594.25	413.02	622.18	773.48	668.41	598.54	594.82	1048.29	713.02	701.48	483.06
5	915.48	302.75	729.51	498.72	559.42	704.92	616.54	730.29	722.32	703.22	1072.16	594.81	594.81	701.28
6	904.92	401.62	992.71	632.61	713.17	632.87	730.29	527.81	648.16	481.52	773.54	663.08	733.29	650.54
7	778.65	382.54	836.95	702.87	629.54	716.02	344.18	773.02	622.54	733.16	929.17	722.16	487.16	713.02
8	1217.16	195.27	808.54	711.54	730.51	775.48	594.22	498.16	532.02	542.02	639.86	483.92	663.02	498.62
Mean	967.867	318.149	828.277	594.881	656.088	661.496	647.644	635.856	646.564	623.384	913.567	663.585	633.62	600.252
SD	137.161	76.1789	109.326	94.7944	127.206	64.0819	147.58	99.618	62.1086	86.5738	151.067	89.988	77.6338	96.4533
TTEST-S		1.27576e-08	0.0409797	1.86775e-05	0.000332255	5.26027e-05	0.000503567	7.28909e-05	3.0612e-05	3.21505e-05	0.464103	0.000123668	3.26372e-05	2.31041e-05
TTEST-O			3.45624e-08	1.55777e-05	1.53152e-05	1.26825e-07	6.41531e-05	4.81659e-06	1.87203e-07	2.9382e-06	9.88967e-08	9.06621e-07	1.02076e-06	1.42067e-05
TTEST-EAP						0.121881	0.409188	0.413511	0.217995	0.540135	0.000175973	0.159257	0.386306	0.912151
TTEST-TM						0.915992	0.904184	0.728493	0.851813	0.557347	0.00243649	0.893683	0.676283	0.339324
ANOVA-S		<0.01	<0.01	<0.01	<0.01	<0.01	<0.01	<0.01	<0.01	<0.01	NS	<0.01	<0.01	<0.01
ANOVA-O			<0.01	<0.01	<0.01	<0.01	<0.01	<0.01	<0.01	<0.01	<0.01	<0.01	<0.01	<0.01
ANOVA-EAP						NS	NS	NS	NS	NS	<0.01	NS	NS	NS
ANOVA-TM						NS	NS	NS	NS	NS	<0.01	NS	NS	NS
% Changes		-67.1289	160.343	86.9821	106.22	107.92	103.566	99.8613	103.227	95.941	187.151	108.577	99.1584	88.6704
4. Tbt (μm)
Mice	Sham	Control	Risedronate	EAP 200	TM 200	1:1	1:3	1:5	1:7	1:9	3:1	5:1	7:1	9:1
1	66.21	46.81	42.72	52.77	51.29	51.69	50.32	58.44	60.71	52.17	65.11	53.41	51.42	53.29
2	71.03	39.75	39.82	50.32	50.48	49.82	58.92	70.21	48.92	48.02	59.81	49.72	48.02	52.71
3	58.92	24.98	21.54	49.81	49.16	50.72	40.17	41.92	42.17	53.26	60.38	52.22	43.16	48.02
4	90.82	20.22	44.16	48.16	44.28	43.98	55.39	49.87	55.25	50.48	49.81	43.02	55.27	50.16
5	61.62	43.83	48.62	51.62	50.32	55.36	60.82	47.95	49.72	49.76	66.75	41.92	46.45	44.57
6	66.43	27.92	27.02	50.27	49.72	54.16	45.71	63.22	45.81	48.17	70.27	55.04	52.94	39.86
7	59.42	38.62	44.95	48.16	41.62	42.82	41.95	48.01	44.73	44.02	63.92	62.61	43.92	45.95
8	73.02	45.11	23.22	44.28	53.98	41.02	44.81	42.16	50.26	73.16	58.17	48.29	61.22	53.02
Mean	68.4338	35.905	36.5062	49.4237	48.8563	48.6962	49.7612	52.7225	49.6962	52.38	61.7775	50.7788	50.3	48.4475
SD	10.3928	10.126	10.8015	2.6006	3.98387	5.40208	7.85683	10.2126	5.96991	8.86183	6.26331	6.68824	6.13976	4.79076
TTEST-S		1.82635e-05	3.12034e-05	0.000187821	0.00020372	0.000301111	0.00118454	0.00865292	0.000579909	0.00501133	0.143078	0.00121568	0.0008096	0.000217555
TTEST-O			0.910187	0.00258655	0.00461081	0.00705845	0.00851587	0.00518457	0.00507273	0.00380514	2.53554e-05	0.00377741	0.00399721	0.00685774
TTEST-EAP						0.736542	0.90981	0.390922	0.907462	0.380589	0.000146871	0.601671	0.715683	0.620354
TTEST-TM						0.947199	0.775636	0.335423	0.745521	0.322391	0.000224253	0.496309	0.5857	0.855459
ANOVA-S		<0.01	<0.01	<0.01	<0.01	<0.05	<0.01	<0.01	<0.01	<0.01	NS	<0.01	<0.01	<0.01
ANOVA-O			NS	<0.01	<0.01	<0.05	<0.05	<0.01	<0.01	<0.01	<0.01	<0.01	<0.01	<0.01
ANOVA-EAP						NS	NS	NS	NS	NS	<0.01	NS	NS	NS
ANOVA-TM						NS	NS	NS	NS	NS	<0.01	NS	NS	NS
% Changes		-47.5332	1.67456	37.6514	36.0709	35.6253	38.5914	46.8389	38.4104	45.885	72.0582	41.4253	40.0919	34.9325
5. Cbt (μm)
Mice	Sham	Control	Risedronate	EAP 200	TM 200	1:1	1:3	1:5	1:7	1:9	3:1	5:1	7:1	9:1
1	300.86	175.09	176.14	187.19	187.51	180.18	179.04	174.86	190.2	180.45	238.45	189.94	183.01	187.09
2	297.16	201.75	163.92	201.41	183.06	192.42	183.62	193.92	198.16	192.95	257.92	194.17	175.29	213.16
3	314.02	155.48	154.82	211.75	180.27	193.95	201.17	188.7	179.17	201.81	301.58	191.81	201.86	206.54
4	275.98	168.92	177.02	195.45	189.91	190.71	194.18	185.92	183.26	177.49	228.02	197.86	194.16	196.82
5	310.81	166.71	183.96	188.62	185.81	201.84	185.86	193.01	192.54	194.16	217.95	213.02	199.72	179.79
6	262.75	182.92	154.18	202.75	190.28	199.62	207.28	194.26	201.54	208.16	198.9	177.95	200.54	188.54
7	273.98	173.17	172.94	211.08	211.54	211.75	194.92	186.18	188.72	181.02	244.18	201.81	196.81	201.74
8	411.84	144.82	181.11	176.28	182.32	189.68	188.17	203.02	193.62	188.41	202.18	188.49	207.58	196.82
Mean	305.925	171.108	170.511	196.816	188.837	195.019	191.78	189.984	190.901	190.556	236.148	194.381	194.871	196.312
SD	46.585	17.1464	11.5234	12.3417	9.84757	9.43237	9.41893	8.23096	7.34079	10.8474	33.303	10.3217	10.6528	10.934
TTEST-S		2.18977e-06	1.40756e-06	1.64442e-05	6.70668e-06	1.18979e-05	8.69598e-06	6.95942e-06	7.34063e-06	8.29638e-06	0.00393225	1.16614e-05	1.24317e-05	1.45107e-05
TTEST-O			0.936094	0.00396766	0.0237449	0.0038588	0.00976538	0.0139834	0.00952098	0.0168815	0.000229474	0.00537656	0.00496023	0.00349582
TTEST-EAP						0.748284	0.37441	0.213697	0.263462	0.299439	0.0073465	0.675112	0.740797	0.932362
TTEST-TM						0.220624	0.55115	0.804242	0.641945	0.744941	0.00175672	0.290249	0.259056	0.172743
ANOVA-S		<0.01	<0.01	<0.01	<0.01	<0.01	<0.01	<0.01	<0.01	<0.01	<0.01	<0.01	<0.01	<0.01
ANOVA-O			NS	<0.01	<0.05	<0.01	<0.05	<0.05	<0.05	<0.05	<0.01	<0.01	<0.01	<0.01
ANOVA-EAP						NS	NS	NS	NS	NS	<0.01	NS	NS	NS
ANOVA-TM						NS	NS	NS	NS	NS	<0.01	NS	NS	NS
% Changes		-44.0688	-0.348465	15.0249	10.3619	13.9744	12.0816	11.0318	11.568	11.3664	38.0112	13.6018	13.8882	14.7305
NS: not significances by ANOVA test				Red color, significant by LSD test
				Blue color, significant by MW test
